# Supplementary material for: Quantifying Southern Annular Mode paleo-reconstruction skill in a model framework
Source: Copernicus journal article supplement (doi:10.5194/cp-17-1819-2021), 2021-09-13
Supplement: Supplementary file 3 [file cp-17-1819-2021-supplement.zip]

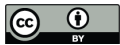

## *Supplement of*

# **Quantifying Southern Annular Mode paleo-reconstruction skill in a model framework**

**Willem Huiskamp and Shayne McGregor**

*Correspondence to:* Willem Huiskamp ([huiskamp@pik-potsdam.de](mailto:huiskamp@pik-potsdam.de))

- [cp-17-1819-2021-supplement-title-page.pdf](#)
- Supplement
  - [RMSE.pdf](#)
  - [nonstat\\_prob\\_final.pdf](#)

The copyright of individual parts of the supplement might differ from the article licence.
