# Supplementary figures and images for: Quantifying Southern Annular Mode paleo-reconstruction skill in a model framework
Source: Copernicus journal article supplement (doi:10.5194/cp-17-1819-2021), 2021-09-13

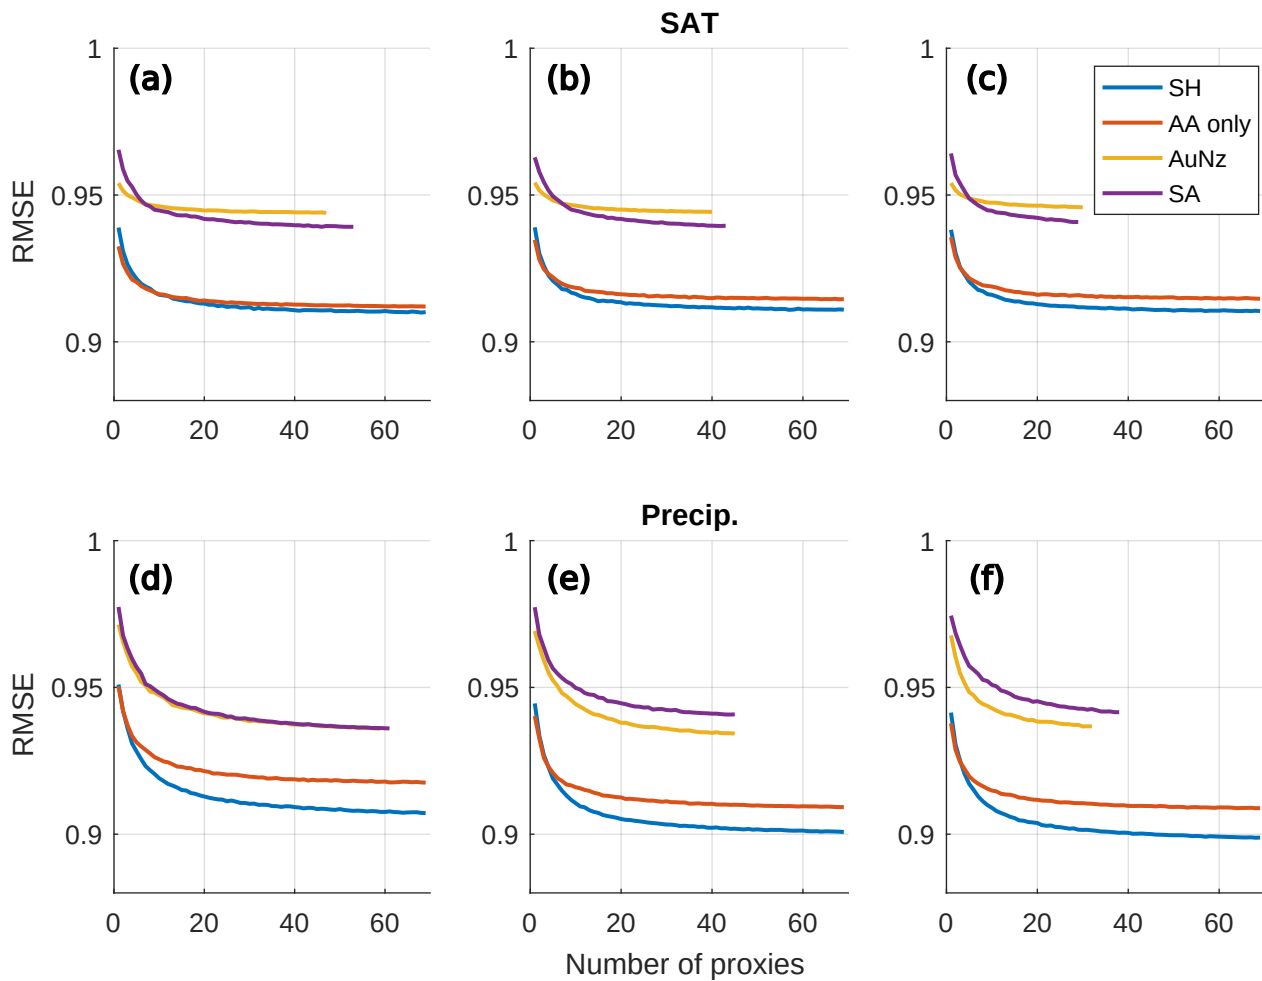

Supplement: Supplementary file 1 [file cp-17-1819-2021-supplement.zip]

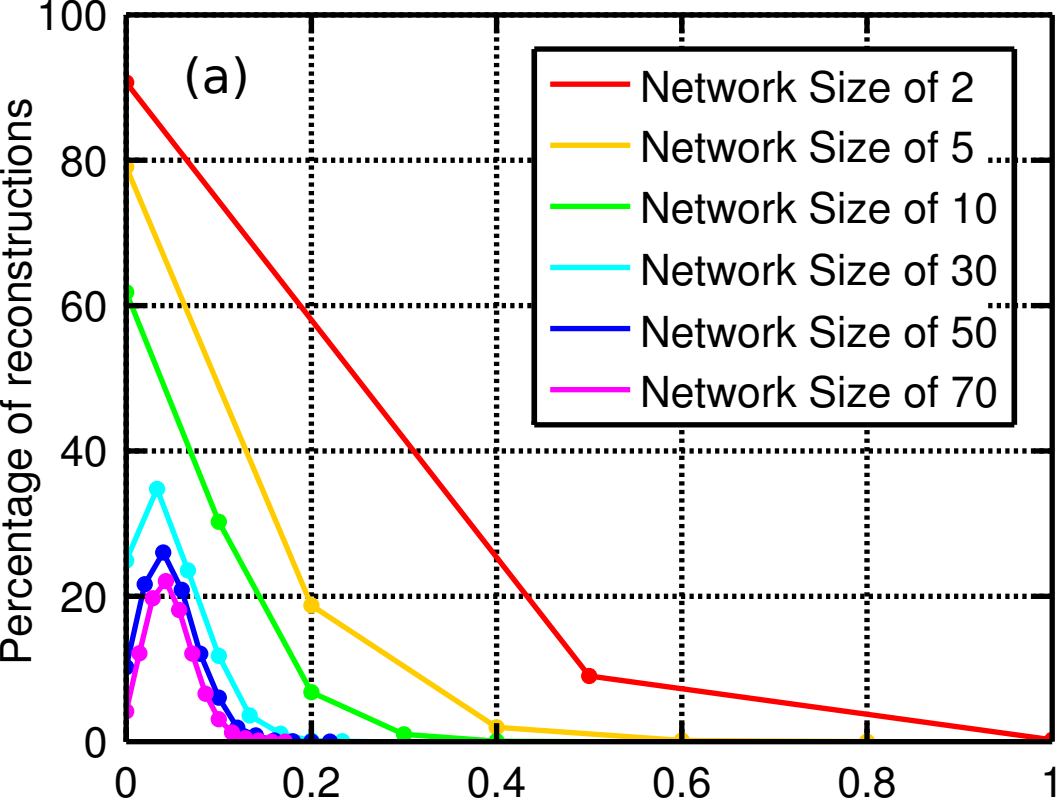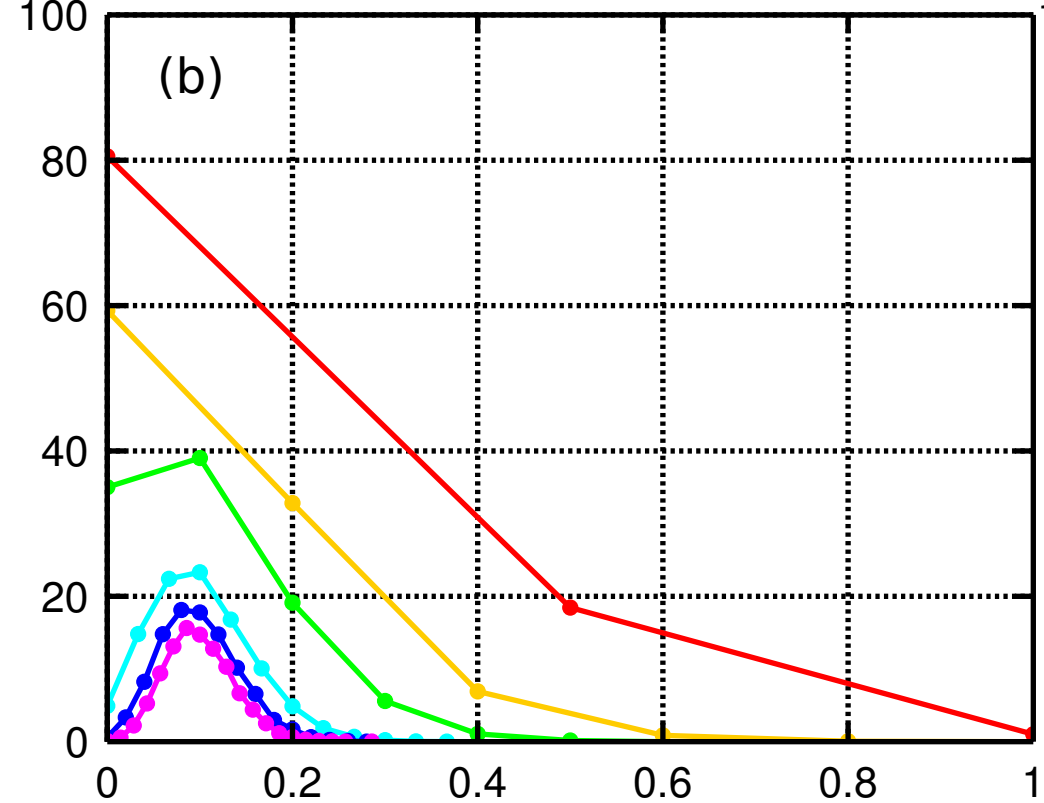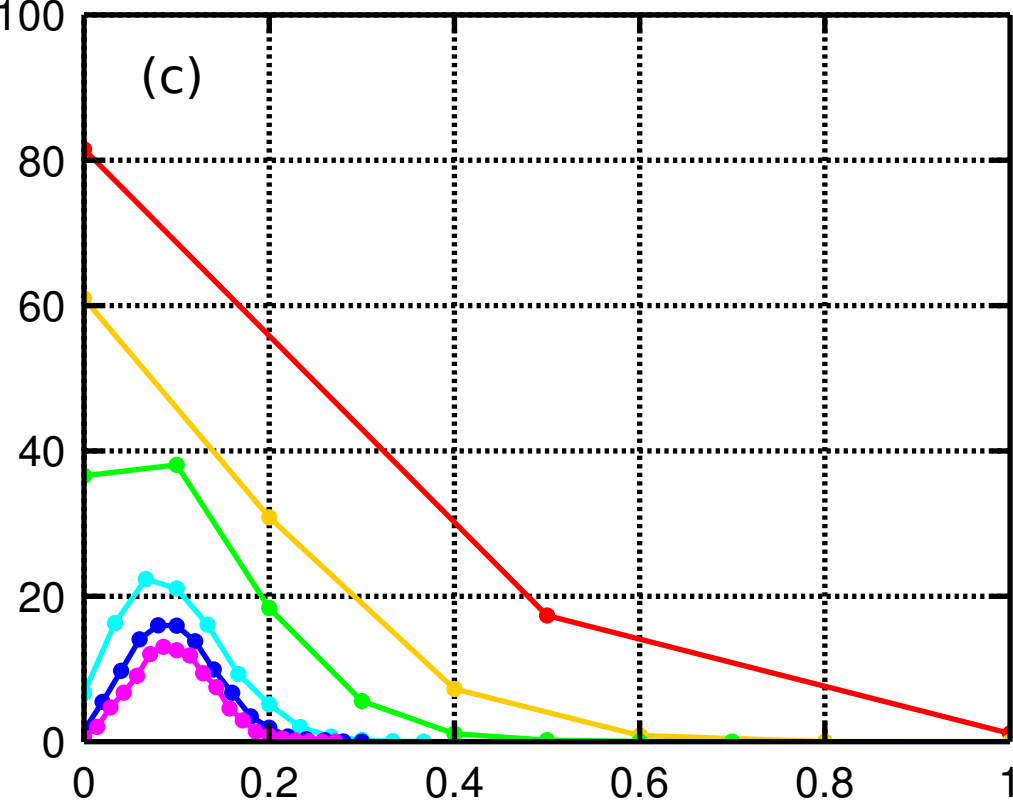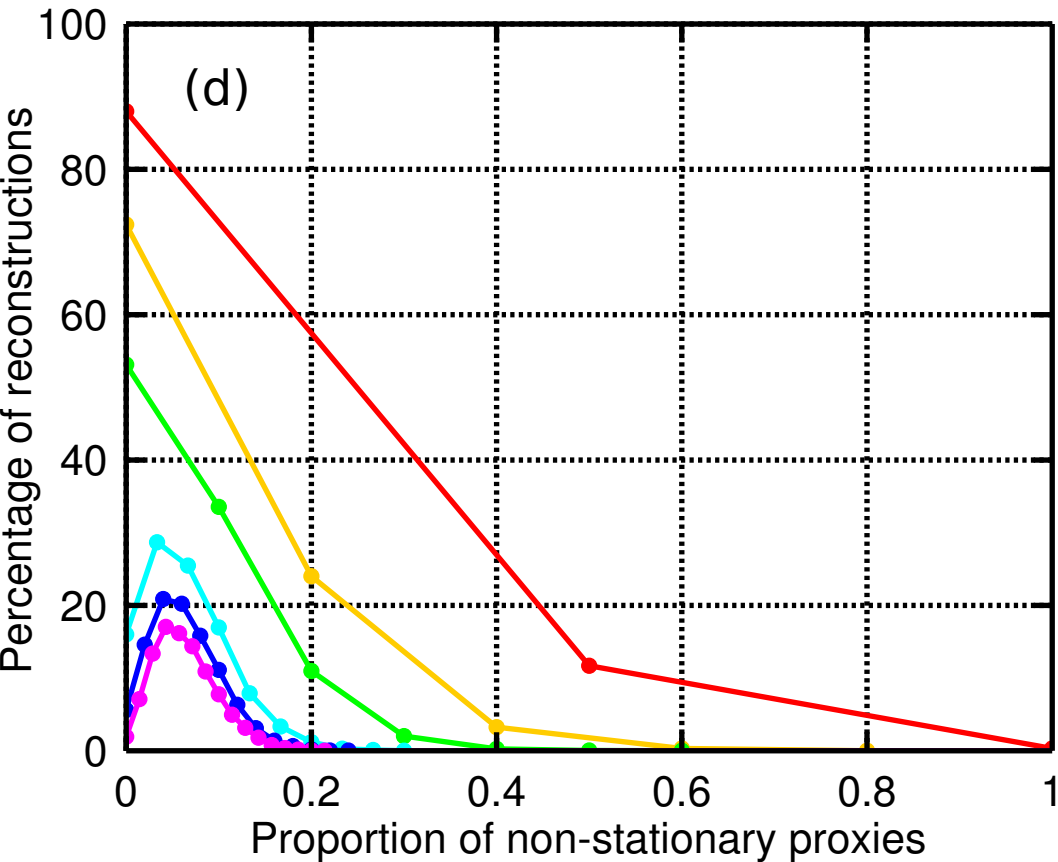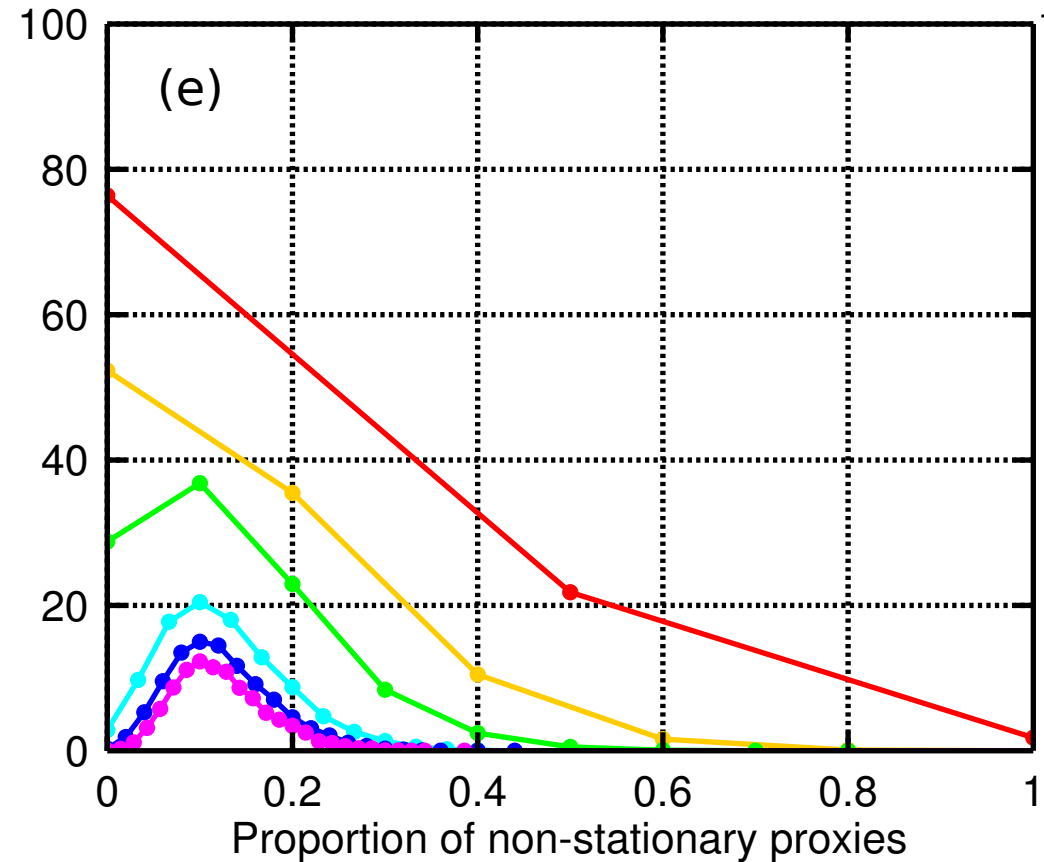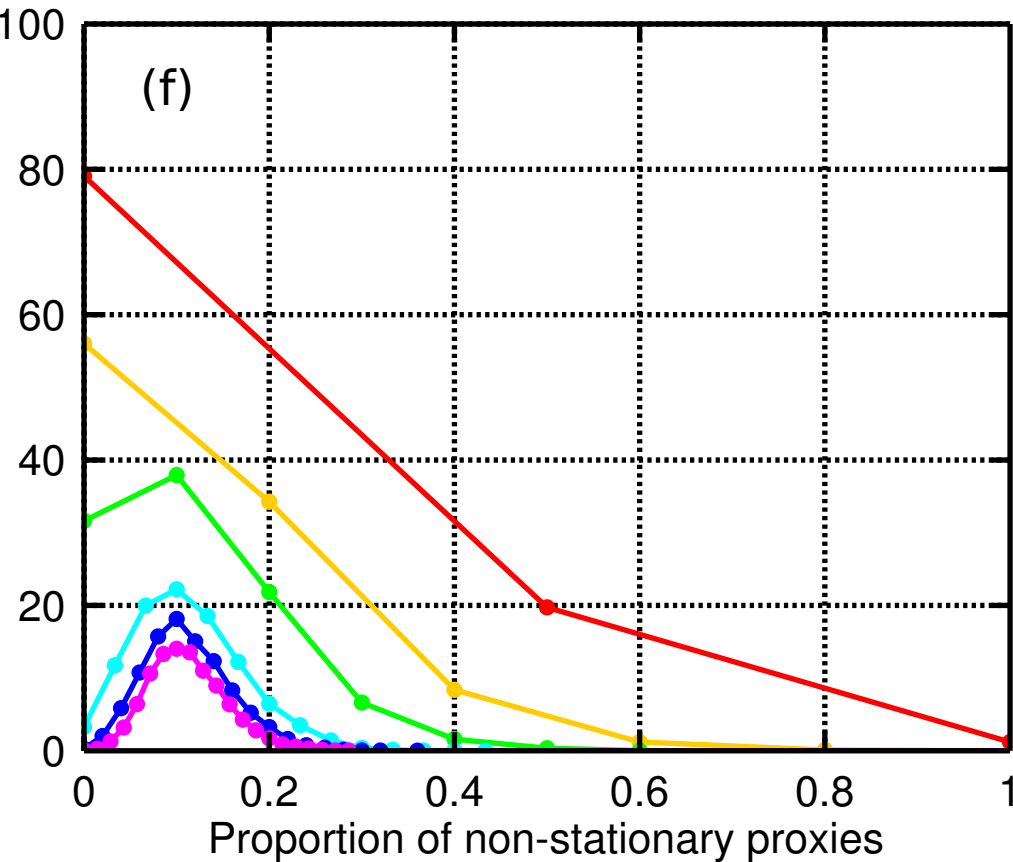

Supplement: Supplementary file 2 [file cp-17-1819-2021-supplement.zip]
